# Supplementary material
Source: Springer Nature journal article supplement (https://www.springermedizin.de/resource/supplementary/13046_2010_444_MOESM6_ESM.pdf/9662246)

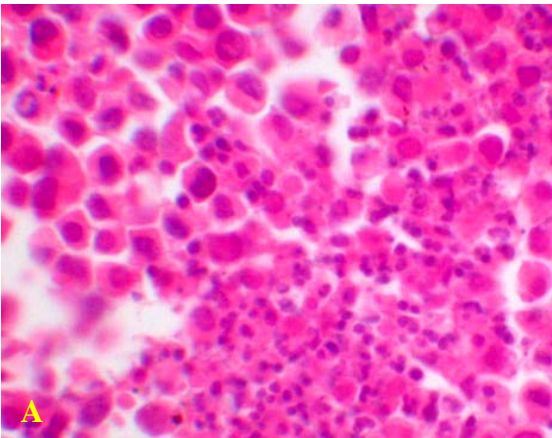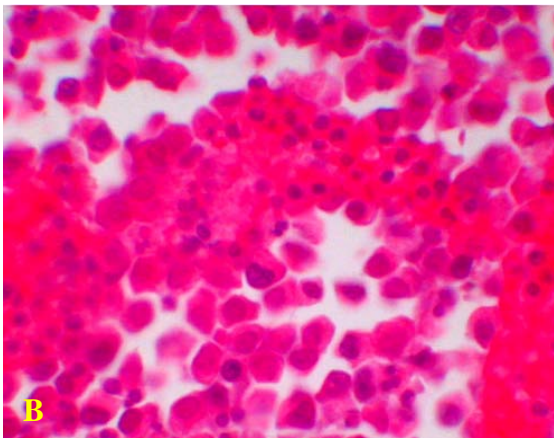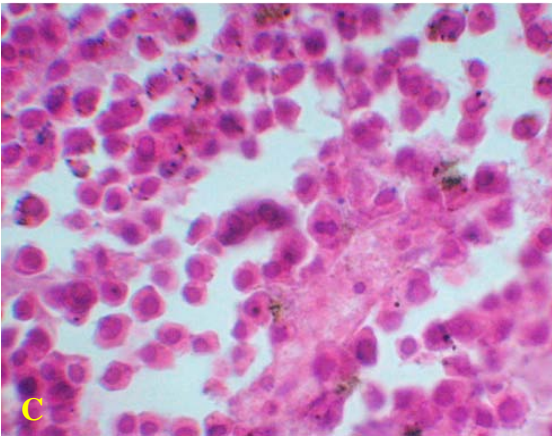

Supplement: MOESM6 [file 9662246]
